# Supplementary material for: Frustrated endocytosis controls contractility-independent mechanotransduction at clathrin-coated structures
Source: PubMed Central journal article supplement (PMC6148028; doi:10.1038/s41467-018-06367-y), 2018-09-20
Supplement: 41467_2018_6367_MOESM3_ESM.pdf [file 41467_2018_6367_MOESM3_ESM.pdf]

## Description of Additional Supplementary Files

### Supplementary Movie 1

**Description: CCS dynamics is regulated by substrate rigidity.** HeLa cells genome-edited to express endogenous GFP-tagged  $\mu$ 2-adaptin were seeded onto collagen-coated polyacrylamide gels of the indicated stiffness. The next day, cells were imaged by spinning disk microscopy every 5s for 5 min. Scale bar: 5  $\mu$ m. Time is indicated in seconds.

### Supplementary Movie 2

**Description:  $\beta$ 5-integrin is required for plaque formation.** HeLa cells genome-edited to express endogenous GFP-tagged  $\mu$ 2-adaptin were treated with the control (left panel) or  $\beta$ 5-specific (right panel) siRNAs, as indicated. 48 h later, cells were seeded onto collagen-coated glass-bottom dishes and imaged the next day by spinning disk microscopy every 5s for 5 min. Scale bar: 5  $\mu$ m. Time is indicated in seconds.

### Supplementary Movie 3

**Description: Trypsin-induced plaque disassembly is accompanied by CCPs budding marked by auxillin bursts.** HeLa cells genome-edited to express endogenous mCherry-tagged  $\mu$ 2-adaptin (red) were transfected with a plasmid encoding for GFP-tagged Auxillin (green) and seeded onto collagen-coated glass-bottom dish. The next day, cells were briefly washed in PBS before being incubated with trypsin (see materials and methods) and imaged by spinning disk microscopy every 2s for 3 min. Scale bar: 2  $\mu$ m. Time is indicated in seconds.

#### **Supplementary Movie 4**

**Description: Cilengitide treatment prevents plaque formation.** HeLa cells genome-edited to express endogenous GFP-tagged  $\mu$ 2-adaptin were seeded onto collagen-coated glass-bottom dishes. The next day, cells were treated with 10  $\mu$ M Cilengitide for 30 min and imaged by spinning disk microscopy every 5s for 5 min. Scale bar: 5  $\mu$ m. Time is indicated in seconds.

#### **Supplementary Movie 5**

**Description: Dynamics of Cilengitide-induced plaque disassembly.** HeLa cells genome-edited to express endogenous mCherry-tagged  $\mu$ 2-adaptin were seeded onto collagen-coated glass-bottom dishes. The next day, cells were treated with 10  $\mu$ M Cilengitide and imaged immediately by spinning disk microscopy every 10s for 10 min. Scale bar: 5  $\mu$ m. Time is indicated in seconds.

#### **Supplementary Movie 6**

**Description: Immobilizing the TfR receptor stalls CCSs dynamics.** HeLa cells genome-edited to express endogenous GFP-tagged  $\mu$ 2-adaptin (green) were transfected with a plasmid encoding for mCherry-TfR (red) and seeded onto anti-mCherry antibody-coated glass-bottom (see materials and methods). The next day, cells were imaged by spinning disk microscopy every 5s for 5 min. Scale bar: 5  $\mu$ m. Time is indicated in seconds.
